# Supplementary material for: Hydrogen(H2) treatment for acute erythymatous skin diseases. A report of 4 patients with safety data and a non-controlled feasibility study with H2 concentration measurement on two volunteers
Source: Springer Nature journal article supplement (doi:10.1186/2045-9912-2-14), 2012-01-01
Supplement: 13618_2011_43_MOESM6_ESM.doc [file 13618_2011_43_MOESM6_ESM.doc]

**Duration of H2 treatment and Lab studies of 4 patietns**

| **Case１：６days** | **chemistry** | | | | | **hematology** | | |
| --- | --- | --- | --- | --- | --- | --- | --- | --- |
| **GOT** | **GPT** | **γ-GPT** | **T-BIL** | **CRP** | **WBC** | **RBCx104** | **Plateletx104** |
| At the beginning | 23 | 58 | 96 | 0.7 | 1.51 | 7800 | 462 | 32.2 |
| 4 days after | 16 | 27 | 66 | 0.4 | 1.89 | 7800 | 430 | 36.8 |
| 9 days after（3 days after resumption | 20 | 22 | 63 |  |  | 10600 | 431 | 52.8 |
| 22days after,(16days  After resumption | 17 | 12 | 45 |  | 0.19 | 8000 | 440 | 51.6 |

| **Case 2:19days** | **chemistry** | | | | | **hematology** | | |
| --- | --- | --- | --- | --- | --- | --- | --- | --- |
| **GOT** | **GPT** | **γ-GPT** | **T-BIL** | **CRP** | **WBC** | **RBCx104** | **Plateletx104** |
| At the beginning | 33 | 58 | 253 | 0.6 | 8.27 | 10200 | 367 | 29.1 |
| 7 days after | 20 | 57 | 244 |  | 8.71 | 18800 | 297 | 20.1 |
| 10days after | 27 | 59 | 233 |  | 9.35 | 37000 | 348 | 3.8 |
| 2 weeks after | 29 | 46 | 210 | 1.9 | 6.53 | 11900 | 288 | 1.9 |
| 18days after | 19 | 35 | 152 | 1.6 | 5.81 | 11200 | 258 | 4.6 |
| 3 weeks after | 15 | 22 | 79 |  | 8.64 | 17700 | 310 | 24.2 |

| **Case３：２hrs** | **chemistry** | | | | | **hematology** | | |
| --- | --- | --- | --- | --- | --- | --- | --- | --- |
| **GOT** | **GPT** | **γ-GPT** | **T-BIL** | **CRP** | **WBC** | **RBC x104** | **plateletx104** |
| At the beginning | 22 | 25 | 28 |  |  | 4500 | 432 | 13.6 |
| 45days after  45days after completion | 19 | 20 | 25 | 0.4 | 0.24 | 4500 | 439 | 15.5 |

| **Case４：３days** | **chemistry** | | | | | **hematology** | | |
| --- | --- | --- | --- | --- | --- | --- | --- | --- |
| **GOT** | **GPT** | **γ-GPT** | **T-BIL** | **CRP** | **WBC** | **RBC（万）** | **plateletx104** |
| At the begining | 25 | 35 | 342 |  | 1.31 | 18000 | 396 | 30.6 |
| 2 days after | 34 | 36 | 286 |  | 0.65 | 21900 | 381 | 26 |
| 5 days after  2 days after completion | 60 | 117 | 300 |  | 1.91 | 13200 | 409 | 11.7 |
