# Supplementary figures and images for: Hydrogen(H2) treatment for acute erythymatous skin diseases. A report of 4 patients with safety data and a non-controlled feasibility study with H2 concentration measurement on two volunteers
Source: Springer Nature journal article supplement (doi:10.1186/2045-9912-2-14), 2012-01-01

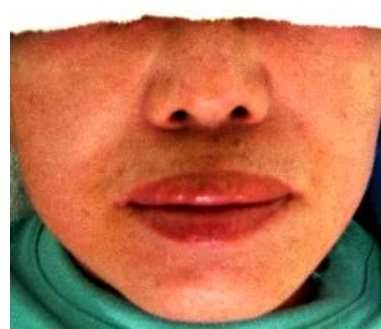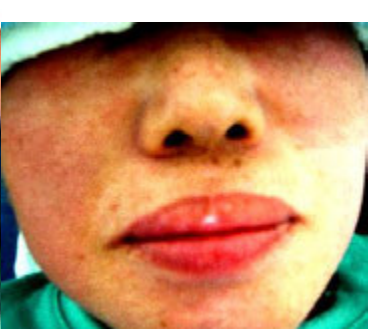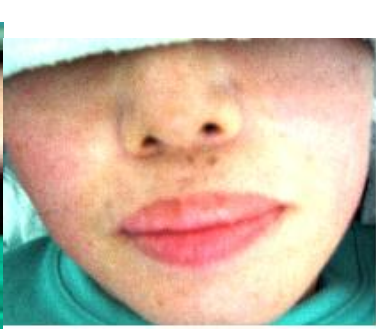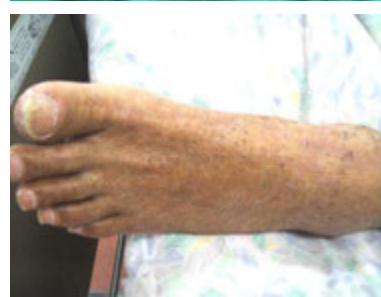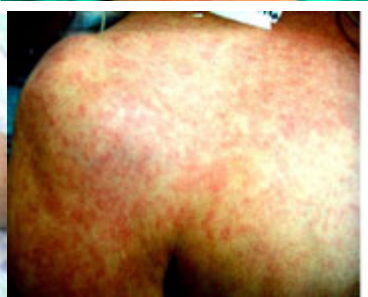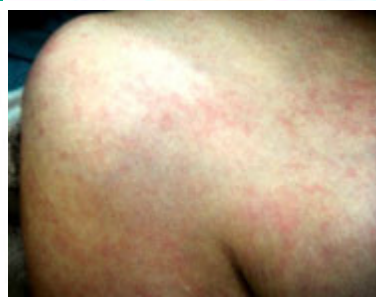

Supplement: 13618_2011_43_MOESM2_ESM.pdf [file 13618_2011_43_MOESM2_ESM.pdf]

# Loss of H<sub>2</sub> concentration in IV bags (measured at the end of IV line)

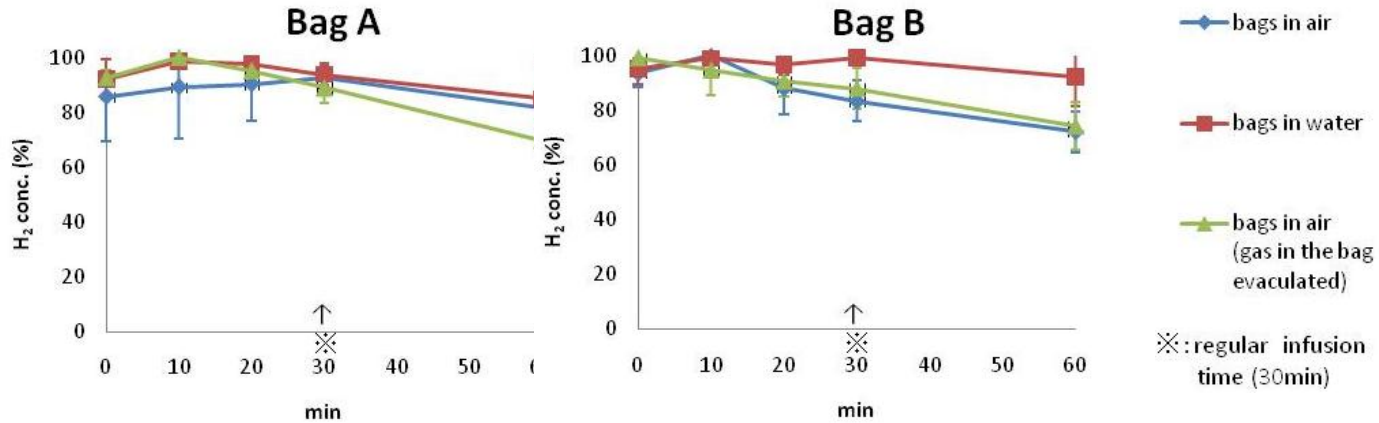

Supplement: 13618_2011_43_MOESM4_ESM.pdf [file 13618_2011_43_MOESM4_ESM.pdf]
